# Supplementary material
Source: publisher figshare collection journal article supplement (https://aacr.figshare.com/articles/dataset/_/23668546)
Supplement: Supplementary file 1 [file 41536729]

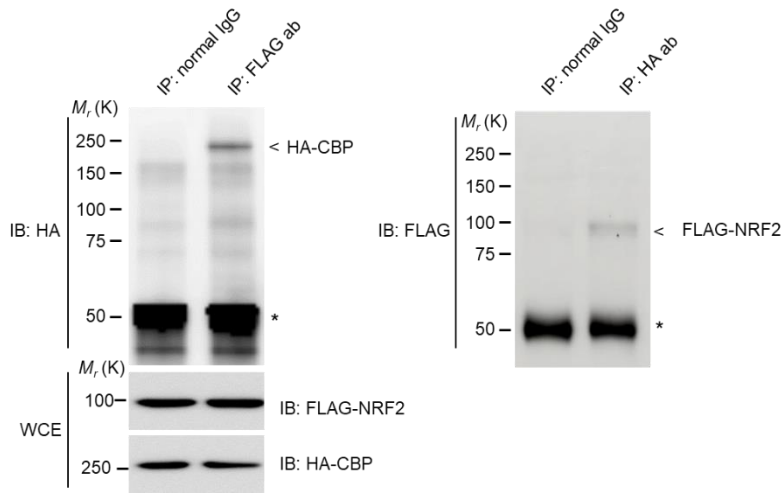

**Fig S4. Interaction between NRF2 and CBP.** Mouse Hepa1-6 (DT81 subline) was co-transfected with FLAG-NRF2 and HA-CBP plasmids and their expression was determined in the whole cell extract (WCE) with antibodies against FLAG or HA tags. The NRF2-CBP complex in the whole cell extract was immunoprecipitated with FLAG antibody and analyzed by immunoblot with HA antibody and vice versa. <, indicated the HA-CBP and FLAG-NRF2 band; \*, indicated the IgG heavy chain.
